# Supplementary material for: Isolation and characterization of malaria PfHRP2 specific VNAR antibody fragments from immunized shark phage display library
Source: PubMed Central journal article supplement (PMC6201582; doi:10.1186/s12936-018-2531-y), 2018-10-24

Additional file 1:

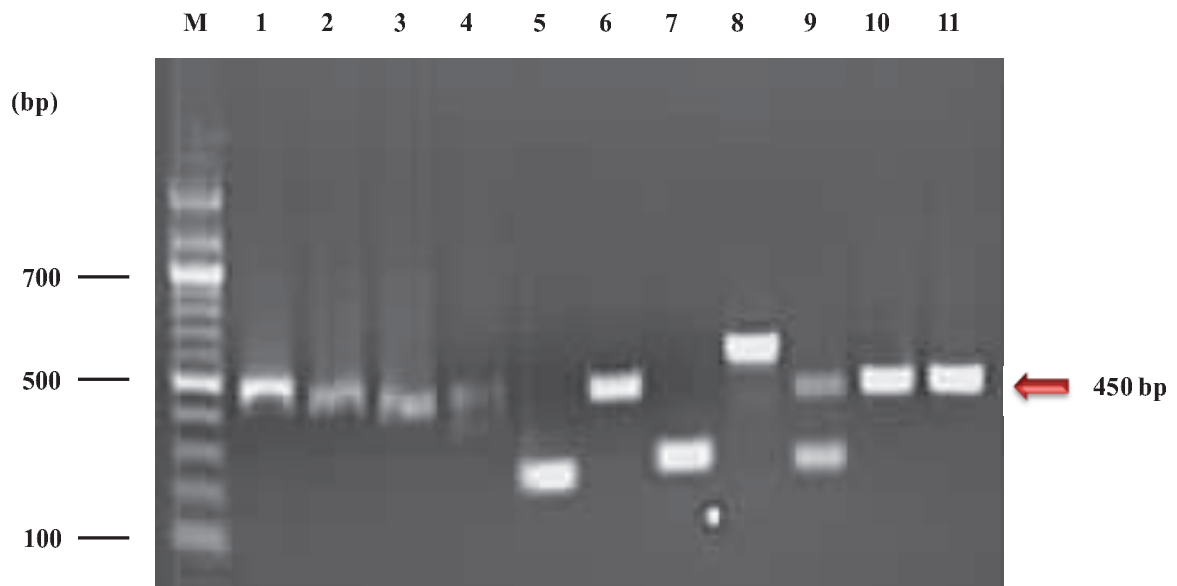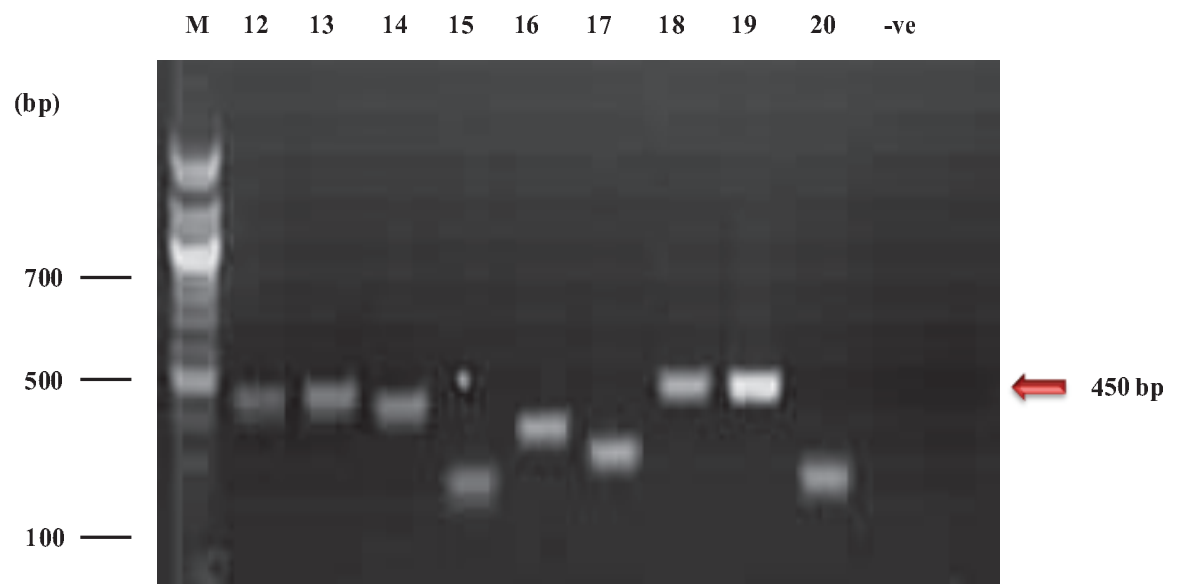

Supplement: 12936_2018_2531_MOESM1_ESM.pdf [file 12936_2018_2531_MOESM1_ESM.pdf]
