# Supplementary material for: Isolation and characterization of malaria PfHRP2 specific VNAR antibody fragments from immunized shark phage display library
Source: PubMed Central journal article supplement (PMC6201582; doi:10.1186/s12936-018-2531-y), 2018-10-24
Supplement: 12936_2018_2531_MOESM2_ESM.pdf [file 12936_2018_2531_MOESM2_ESM.pdf]

Additional file 2:

| Clone                   | CDR1               | HV2       | CDR3                                                     | CDR3 length and number of cysteine | Type |
|-------------------------|--------------------|-----------|----------------------------------------------------------|------------------------------------|------|
| <b>Anti-rPfHRP2</b>     |                    |           |                                                          |                                    |      |
| H8                      | DSANEF <u>C</u> CR | TKEERISIS | EV <u>C</u> V <u>C</u> P <u>C</u> SQSEPD <u>C</u> KPGVIE | 20 - 4                             | 2    |
| H18                     | DAG <u>C</u> GLYS  | TDEQAISIG | EV <u>C</u> DFDR <u>C</u> DN <u>C</u> LS TWSRAYYE        | 21 - 3                             | 2    |
| <b>Anti-rPfLDH</b>      |                    |           |                                                          |                                    |      |
| P9                      | DTIYGLYS           | TNEQRISIG | GAEASIWRYNY                                              | 11 - 0                             | 2    |
| P13                     | DSSKGL <u>C</u> S  | TNGQRISIG | KAFDYDDAES <u>C</u> WHATHE                               | 17 - 1                             | 2    |
| P16                     | DTKHPL <u>C</u> N  | TNEQRISIG | KANVVRIATMRY <u>C</u> ALEENY                             | 19 - 1                             | 2    |
| P25                     | DGD <u>C</u> GLYR  | TVEQTIPIV | GADAPNS <u>C</u> YVDGAGVTTY                              | 18 - 1                             | 2    |
| P2-3                    | DASYSL <u>C</u> S  | TNEETISIG | EACDALL <u>C</u> AAMKGL <u>C</u> RV                      | 17 - 3                             | 2    |
| P3-3                    | DTIHE <u>F</u> CN  | TNEERIEIG | ET <u>C</u> ETYADY <u>C</u> CGDYQ                        | 16 - 3                             | 2    |
| P5-3                    | DTSYGL <u>C</u> S  | TNEQRISIG | EACDDL <u>C</u> YGDY <u>C</u> GEWSGYVE                   | 20 - 3                             | 2    |
| P6-3                    | HTEGSP <u>C</u> N  | TNAARISIA | GVDDGGYTHADSV <u>C</u> GHWSEGY<br>Y                      | 22 - 1                             | 2    |
| P7-3                    | DTSYGL <u>C</u> N  | TNEQRISIG | EACDAYS <u>D</u> CA <u>L</u> CLSWRP                      | 17 - 3                             | 2    |
| P8-3                    | DSNYGLLR           | TNEQRISIG | ETSPY <u>C</u> DGWSRHGE                                  | 14 - 1                             | 2    |
| P9-3                    | DTTYGL <u>C</u> S  | TNEQRISIG | GADDDVPGGSAS <u>C</u> YGGPWDDR<br>YN                     | 23 - 1                             | 2    |
| P10-3                   | DTRYDP <u>C</u> N  | TNQRISIG  | ETSPL <u>C</u> DDWSPNGD                                  | 14 - 1                             | 2    |
| <b>Anti-rPvAldolase</b> |                    |           |                                                          |                                    |      |
| A8                      | DASYGL <u>C</u> S  | TNEQTISIG | QAYDGNYS <u>D</u> CYWTG DGY                              | 19 - 1                             | 2    |
| A15                     | DSMHGL <u>C</u> S  | TNEQRISIG | EQYMPTS <u>C</u> AAWSGFE                                 | 15 - 1                             | 2    |
| A16                     | DAK <u>C</u> ALYR  | TNEETISIG | EASTLARSH <u>C</u> DELELELGE                             | 19 - 1                             | 2    |
| A17                     | DGR <u>C</u> GLHD  | TNEQTISIG | NAYDWSQDAS <u>C</u> YGSINYE                              | 18 - 1                             | 2    |
| A1-3                    | DAR <u>C</u> GLYS  | TNEQRISIG | EAC <u>V</u> RYS PKATAIGGVGYE                            | 19 - 1                             | 2    |
| A3-3                    | DVVYGM <u>C</u> T  | TNELGISIG | ETSPI <u>C</u> DGWSPHGE                                  | 14 - 1                             | 2    |
| A4-3                    | DPG <u>C</u> GLYS  | TGEQTISIG | GVDDGRSDDGRT <u>F</u> AC <u>Y</u> F AAG                  | 20 - 1                             | 2    |
| A5-3                    | DTTYGL <u>C</u> S  | TNEQGISIG | ETSPM <u>C</u> DGWSPNGE                                  | 14 - 1                             | 2    |
| A7-3                    | DTSSGL <u>C</u> G  | TSEETIYNG | GGDSATI <u>S</u> TG <u>C</u> RGVLSL                      | 17 - 1                             | 2    |
| A8-3                    | DVVYGM <u>C</u> T  | TNELGISIG | EACDGGIY <u>S</u> D <u>C</u> YAGDRAYFE                   | 21 - 3                             | 2    |
| A9-3                    | DTSFGLYN           | TNEQTISIG | KAYAE PGYR <u>C</u> SWNWE                                | 15 - 1                             | 2    |
| A10-3                   | DTKHGL <u>C</u> S  | TNEQRISIG | ETSPY <u>C</u> DGWSPNGD                                  | 14 - 1                             | 2    |
